# Supplementary material for: Construction of magnetic MoS2/NiFe2O4/MIL-101(Fe) hybrid nanostructures for separation of dyes and antibiotics from aqueous media
Source: Royal Society of Chemistry journal article supplement (doi:10.1039/d4ra00505h), 2024-01-01
Supplement: d4ra00505h1.pdf [file d4ra00505h1.pdf]

## Supplementary Information (SI)

### Construction of magnetic $\text{MoS}_2/\text{NiFe}_2\text{O}_4/\text{MIL-101}(\text{Fe})$ hybrid nanostructures for separation of dyes and antibiotics from aqueous media

Mehri Moradi-Bieranvand<sup>a</sup>, Saeed Farhadi<sup>a\*</sup>, Abedin Zabardasti<sup>a\*</sup> and Farzaneh Mahmoudi<sup>b</sup>

<sup>a</sup> Department of Inorganic Chemistry, Faculty of Chemistry, Lorestan University, Khorramabad, 68151-44316, Iran.

<sup>b</sup> Department of Chemistry, University of Miami, Miami, FL, 33134, United States

\*Corresponding authors. E-mail addresses: [farhadi.s@lu.ac.ir](mailto:farhadi.s@lu.ac.ir) (S. Farhadi), and [zabardasti.a@lu.ac.ir](mailto:zabardasti.a@lu.ac.ir) (A. Zabardasti)

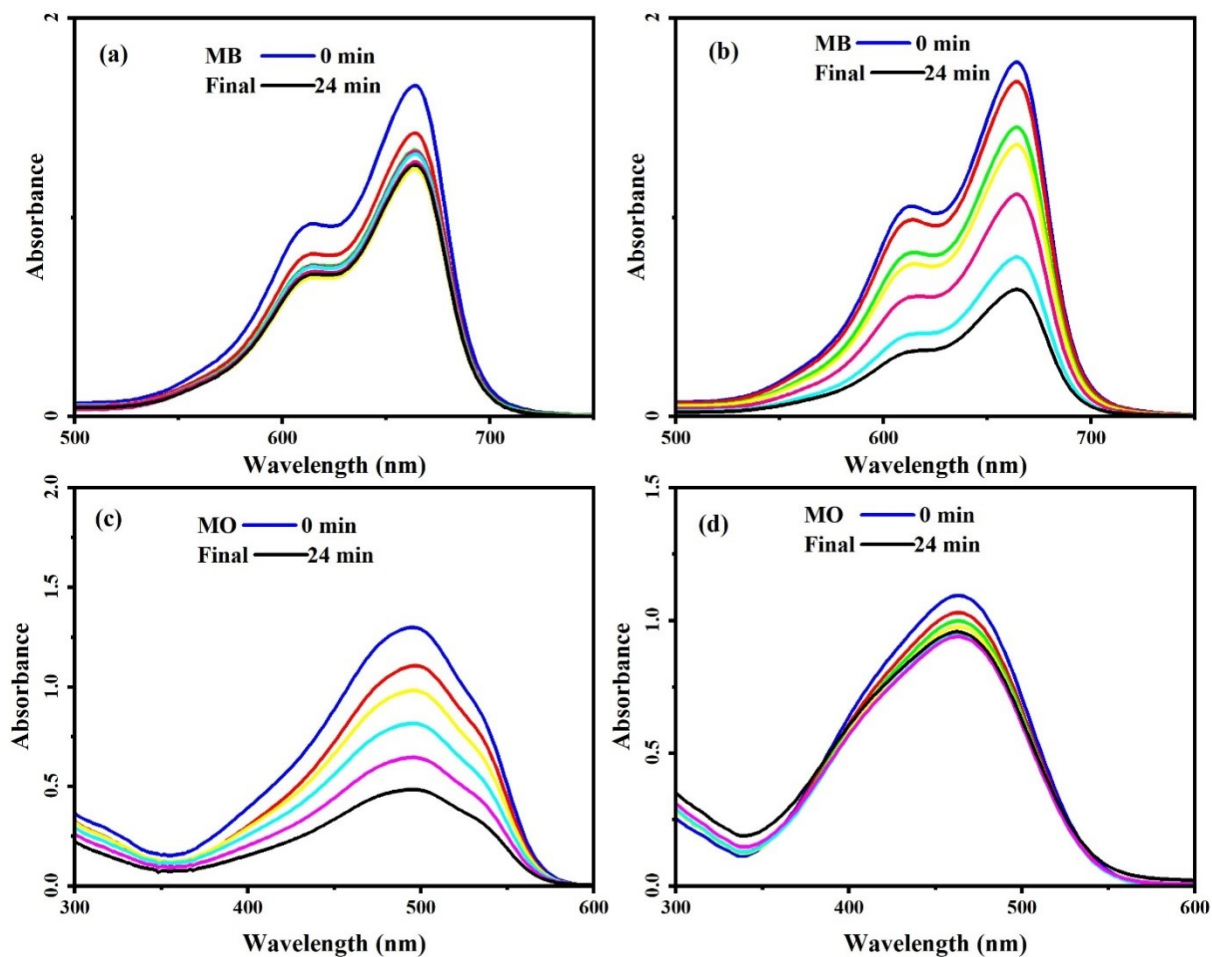

**Fig. 1S.** The UV-Vis spectra during adsorption of MB and MO dyes over with different adsorbents: (a) MB - MIL-101(Fe), (b) MB - MoS<sub>2</sub>, (c) MO - MIL-101(Fe), and (d) MO - MoS<sub>2</sub>. Conditions:  $C_{0(\text{dye})} = 25 \text{ mg L}^{-1}$ ,  $V_{(\text{dye})} = 30 \text{ mL}$ , adsorbent dosage = 25 mg at 25 °C.

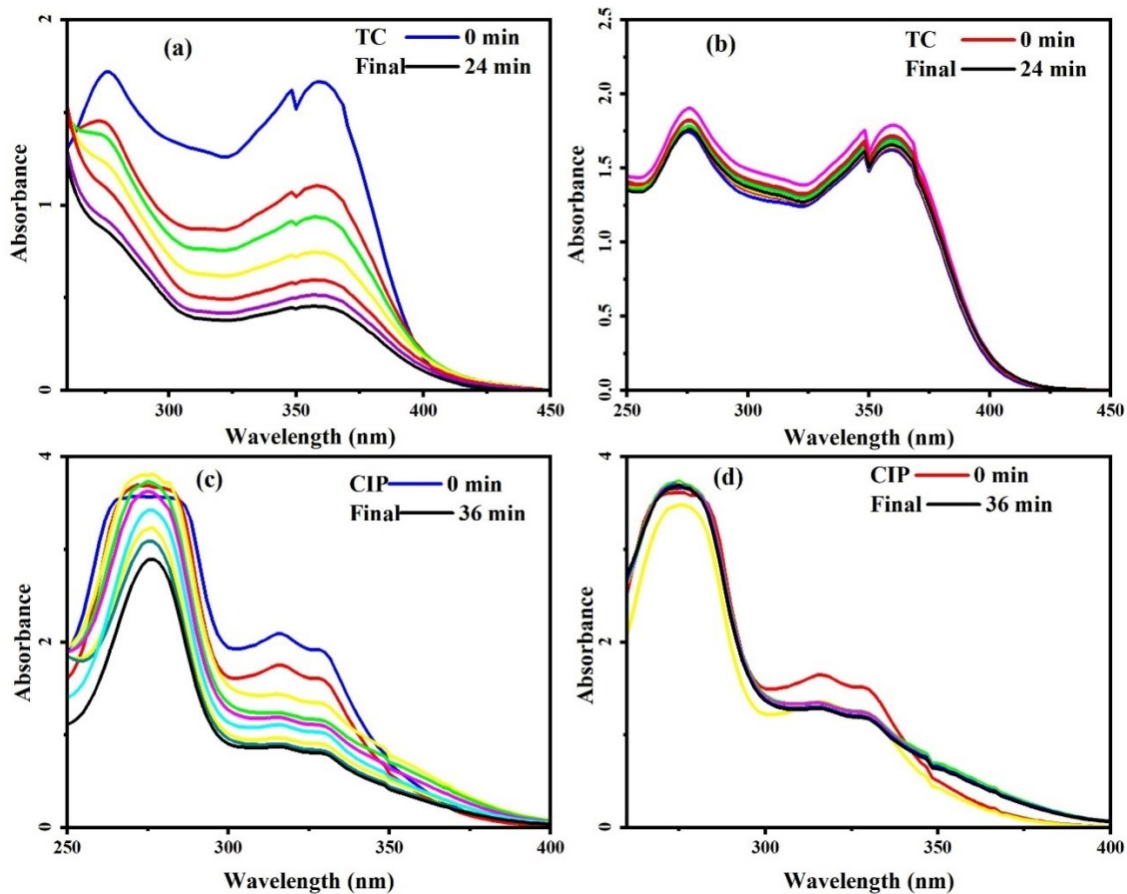

**Fig. 2S.** UV-vis spectral changes of TC and CIP drugs aqueous solutions with different adsorbents. (a) TC- MIL-101(Fe), (b) TC - MoS<sub>2</sub>, (c) CIP - MIL-101(Fe), (d) CIP - MoS<sub>2</sub>. Conditions:  $C_{0(\text{drug})} = 75 \text{ mg L}^{-1}$  for TC and  $50 \text{ mg L}^{-1}$  for CIP,  $V_{(\text{drug})} = 50 \text{ mL}$ , adsorbent dose: 25 mg at 25 °C.

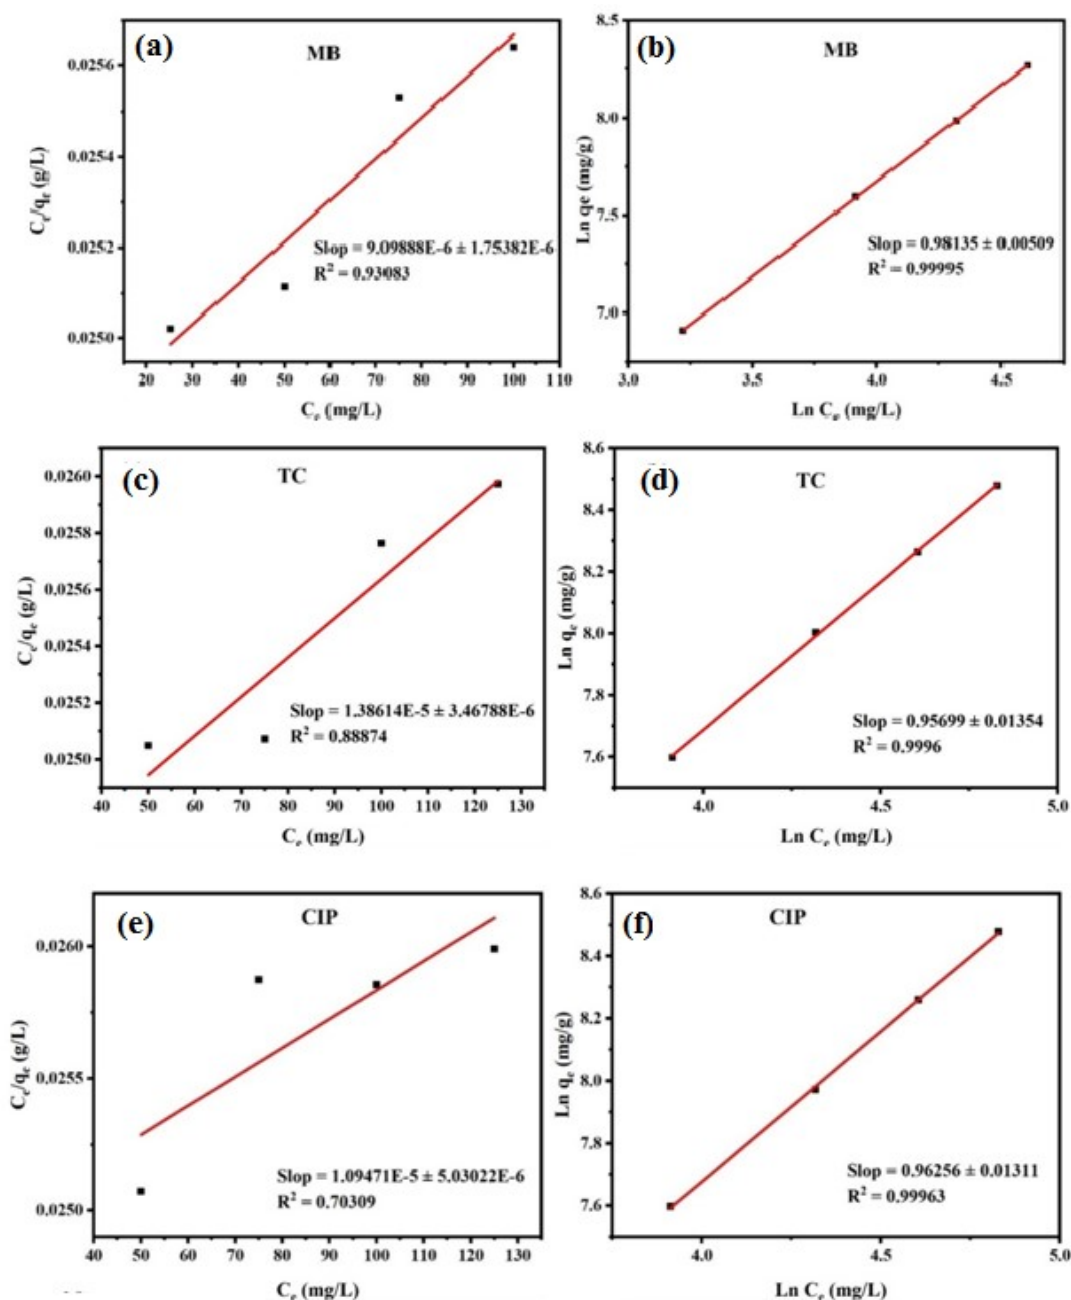

**Fig. 3S.** Langmuir isotherm and Freundlich isotherm, for the adsorption process of (a)-(b) MB, (c)-(d) TC, and (e)-(f) CIP onto the  $\text{MoS}_2/\text{NiFe}_2\text{O}_4/\text{MIL-101}(\text{Fe})$  nanocomposite. Experimental conditions: solution volume  $\square$  30 mL, adsorbent dosage  $\square$  25 mg and temperature  $\square$  25  $^\circ\text{C}$ .

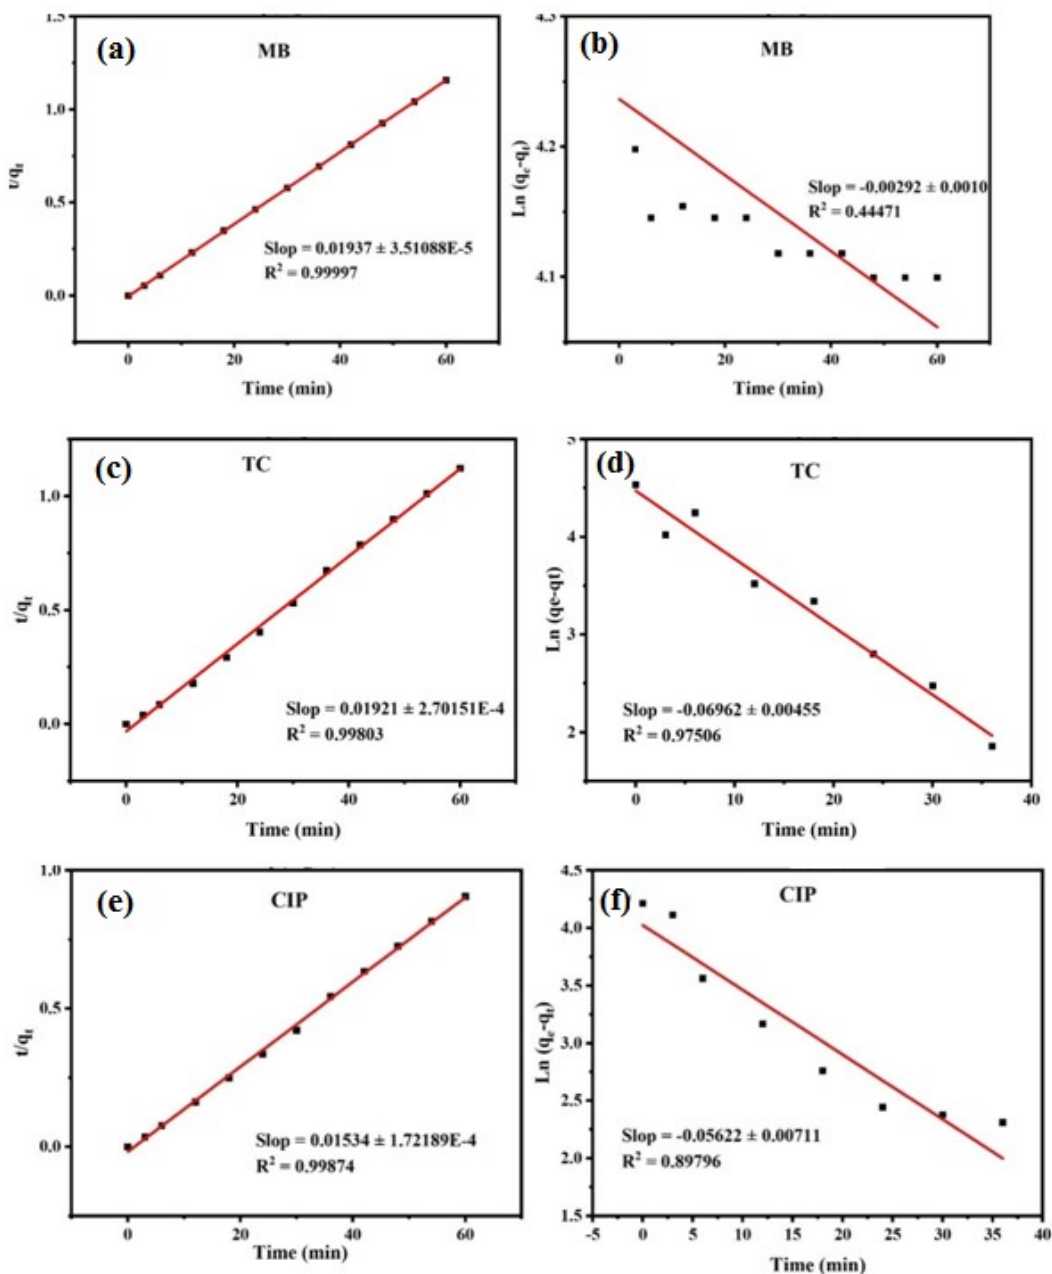

**Fig.4S.** Pseudo-second-order kinetics and Pseudo-first-order kinetics (d) for the adsorption process of (a)-(b) MB, (c)-(d) TC, and (e)-(f) CIP onto the MoS<sub>2</sub>/NiFe<sub>2</sub>O<sub>4</sub>/MIL-101(Fe) nanocomposite.. Experimental conditions: solution volume  $\square$  50 mL, adsorbent dosage  $\square$  25 mg and temperature  $\square$  25 °C.
